# Supplementary material
Source: PubMed Central journal article supplement (PMC5592659)
Supplement: 10.1074_M117.787952_jbc.M117.787952-1.pdf [file 10.1074_M117.787952_jbc.M117.787952-1.pdf]

A

|                    |     |                                                                 |     |
|--------------------|-----|-----------------------------------------------------------------|-----|
| Q7RTT9 S29A4_HUMAN | 1   | MGSVGSQRLEEPSVAGTDPDGVVMSFTFDSHQLEEAEEAAQGGQLRARGVPAFTDITL      | 59  |
| Q9BZD2 S29A3_HUMAN | 1   | MAVVSDEDDQHS-----S-----NSTYRITSSSLRAD-QEALLEKLLDR               | 38  |
| Q7RTT9 S29A4_HUMAN | 60  | ----EVPVDDRYHAIYFAMLLAGVGFLLPYNSFITDVDYLHKKYPGTISI-----         | 104 |
| Q9BZD2 S29A3_HUMAN | 39  | PPGLQRPEDRFCGTYIIFSLGIGSLLPWNFFITAKEYWMFKLRNSSSPATGEDPEGSD      | 98  |
| Q7RTT9 S29A4_HUMAN | 105 | VFDMSLTYILV----ALAAVLLNNVVERLTLHTRITAGYLLALGPLLFLIS-----ICD     | 154 |
| Q9BZD2 S29A3_HUMAN | 99  | ILNYFESYLAVASTVPSMCLVANFLLVNRVAVHVRVLAISLTVLILAFMVIATLVKVDTS    | 158 |
| Q7RTT9 S29A4_HUMAN | 155 | VWLQFSDQAYAINLAAVGTVAFGCTVQSSFFGYTGMPLPKRYTQGVMTGESTAGVMIS      | 214 |
| Q9BZD2 S29A3_HUMAN | 159 | SWTRGF-----FAVITVCMVILSGASTVFSSSIYGMTGSFPMRNSQALISGGAMGGTVSA    | 213 |
| Q7RTT9 S29A4_HUMAN | 215 | LSRILTKLLLPDERASTLIFFLVSVALELLCFLHLLVRRSRFVLYFTRPRDSDHRGPRG     | 274 |
| Q9BZD2 S29A3_HUMAN | 214 | VASLVDLAASSDVRNSALAFFLTATVFLVLCMGLYLLSRLEYARYMRPVLAAHV----      | 269 |
| Q7RTT9 S29A4_HUMAN | 275 | LGRGYGYRVHHDVVDVHFEHPAPALAPNESPKDSPAHEVTGSSGAYMRFDVPRPRVQR      | 334 |
| Q9BZD2 S29A3_HUMAN | 270 | -----FSGEE-----LFDQSLSAP--SVASRFIDS-----                        | 293 |
| Q7RTT9 S29A4_HUMAN | 335 | SWPTFRALLLHRYVVARVIWADMLSIATVYFITLCLFPGLESEIRHCIL-----GEW       | 386 |
| Q9BZD2 S29A3_HUMAN | 294 | HTPPLRPILKKTAS-----LGFVCTVYVFFITSLIYPAICTNIESLNKGGSSLWTKFF      | 346 |
| Q7RTT9 S29A4_HUMAN | 387 | LPFLIMAVFNLSDFVKGKILAAALPVD--WRGTHLLACSCLRVVFIPFLFVLCVYPSGMP--- | 441 |
| Q9BZD2 S29A3_HUMAN | 347 | IPLTFLLYNFADLCGRQLTAWIQVPGPNKALPGFVLRTCLIPFLFVLCVYPSGMP---      | 406 |
| Q7RTT9 S29A4_HUMAN | 442 | --ALRHPAWPCIFSLLMGINSNGYFGSVPMILAAGKVPSPKQRELAGNMTVSYMSGLTLGSA  | 500 |
| Q9BZD2 S29A3_HUMAN | 407 | VVQSDVYFALLSLLGLSNGYSLTALLYGPKIVPRELAEATGVVSYMSGLTLGSA          | 466 |
| Q7RTT9 S29A4_HUMAN | 501 | VAYCTYSLTRDAHGSCLHASTANGSILAGL                                  | 530 |
| Q9BZD2 S29A3_HUMAN | 467 | CTLLVHLI-----                                                   | 475 |

B

|                    |     |                                                               |     |
|--------------------|-----|---------------------------------------------------------------|-----|
| Q99808 S29A1_HUMAN | 1   | -----MTTS                                                     | 4   |
| Q7RTT9 S29A4_HUMAN | 1   | MGSVGSQRLEEPSVAGTDPDGVVMSFTFDSHQLEEAEEAAQGGQLRARGVPAFTDITLDE  | 60  |
| Q99808 S29A1_HUMAN | 5   | HQPQDRYKAVWLIFMFLGLTLLPWNFFMTATQYFTNRLDMSQNVSLVTAELSKDAQASA   | 64  |
| Q7RTT9 S29A4_HUMAN | 61  | FVPDDRYHAIYFAMLLAGVGFLLPYNSFITDVDYLHKKYPGTISIVFDMSLTY-----    | 109 |
| Q99808 S29A1_HUMAN | 65  | APAAPLPERNSLSAIFNNVMTLCAMLPLLFTYLNLSFLHQRIPQSVRILGSL-VAILLVF  | 123 |
| Q7RTT9 S29A4_HUMAN | 110 | -----LT-----YILVALAAVLLNNVVERLTLHTRITAGYLLALGPLL              | 148 |
| Q99808 S29A1_HUMAN | 124 | LITAILVKVQL-DALFFVITMIKIVLINSFG-AILQGSFLGAGLLPASTAPIMSGGQ     | 181 |
| Q7RTT9 S29A4_HUMAN | 149 | FISICDVLQFLSRDQAYAINLAAVGTVAFGCTVQSSFFGYTGMPLPKRYTQGVMTGES    | 207 |
| Q99808 S29A1_HUMAN | 182 | LAGEFFASVAMICAIASGSELSAFAFGYFITACAVIILTIICYL--GLPRLEFYRYQQQL  | 238 |
| Q7RTT9 S29A4_HUMAN | 208 | TAGVMISLSRILTKLLLPDERASTLIFFLVSVVA--LELLCFLHLLVRRSRFVLYFTR    | 264 |
| Q99808 S29A1_HUMAN | 239 | KLEG---PGEQ-----ETKLDLISKGEEPGRAGK---ES-GVSVS                 | 271 |
| Q7RTT9 S29A4_HUMAN | 265 | PRDSHRGRPGLGRGYRVHHDVVDVHFEHPAPALAPNESPKDSPAHEVTGSSGAYMR      | 324 |
| Q99808 S29A1_HUMAN | 272 | NSQPTNE---SHSIKAILKN-----ISVLAFVCFIFTITIGMFAVIVEVKSSIAG       | 320 |
| Q7RTT9 S29A4_HUMAN | 325 | FVDRPRVQRSWPTFRALLLHRYVVARVIWADMLSIATVYFITLCLFPGLESEIRHCILG   | 384 |
| Q99808 S29A1_HUMAN | 321 | SSTWERYFIPVSCFLTFNFIWDWLRSLTAV-FMWPGKDSRWLPSVLVRLVFLVLLLCN    | 379 |
| Q7RTT9 S29A4_HUMAN | 385 | E-----WLPILIMAVFNLSDFVKGKILAAALPVDWRGTH--LLACSCLRVVFIPFLFVLCV | 435 |
| Q99808 S29A1_HUMAN | 380 | IKPRRYLTVVFEHDAWFIFFMAAFSNGYLAFLCFCMFPKPKVPAEAEATAGAIMAFFLFC  | 439 |
| Q7RTT9 S29A4_HUMAN | 436 | YPSG--MPALRHPAWPCIFSLLMGINSNGYFGSVPMILAAGKVPSPKQRELAGNMTVSYM  | 492 |
| Q99808 S29A1_HUMAN | 440 | LGLALGAVFSFLFRAIV-----                                        | 456 |
| Q7RTT9 S29A4_HUMAN | 493 | SGLTIGSAVAYCTYSLTRDAHGSCLHASTANGSILAGL                        | 530 |

C

|                    |     |                                                                  |     |
|--------------------|-----|------------------------------------------------------------------|-----|
| Q14542 S29A2_HUMAN | 1   | -----MARG                                                        | 4   |
| Q7RTT9 S29A4_HUMAN | 1   | MGSVGSQRLEEPSVAGTDPDGVVMSFTFDSHQLEEAEEAAQGGQLRARGVPAFTDITLDE     | 60  |
| Q14542 S29A2_HUMAN | 5   | DAPRDSYHLVGSIFFILGLTLLPWNFFITAIPIYFQARLAGAGNSTARILSNHTGPEDA      | 64  |
| Q7RTT9 S29A4_HUMAN | 61  | FVPDDRYHAIYFAMLLAGVGFLLPYNSFITDVDYLHKKYPGTISIVFDMSLTY-----       | 112 |
| Q14542 S29A2_HUMAN | 65  | FNFNWVTLLSQLPLLFTLLNSFLYQCVPETVRIL-GSLLAILL-LFALTAALVKVDMS       | 122 |
| Q7RTT9 S29A4_HUMAN | 113 | -----ILVA----LAAVLLNNVVERLTLHTRITAGYLLALGPLLFLISICDVLQFLS        | 161 |
| Q14542 S29A2_HUMAN | 123 | PGPFFSITMASVCFINSFSAVLQGSFLGQGTMPSTYSTILFSGQGLAGIFAALMLLSM       | 182 |
| Q7RTT9 S29A4_HUMAN | 162 | RDQAYAINLAAVGTVAFGCTVQSSFFGYTGMPLPKRYTQGVMTGESTAGVMISLSRILTK     | 221 |
| Q14542 S29A2_HUMAN | 183 | ASGVDAETSAALGYFITPCVGIILMSIVCYLSLPHL---KFARYLANKSSQAQAQ-EL---    | 235 |
| Q7RTT9 S29A4_HUMAN | 222 | LLLPDERASTLIFFLV--SVALELLCFLHLLVRRSRFVLYFTRPRDSDHRGPRGLGRG       | 278 |
| Q14542 S29A2_HUMAN | 236 | ---ETKAEALLQSDENGIPSSPQKVALTLDLLEKEPESEPEDEP-----QKPF            | 279 |
| Q7RTT9 S29A4_HUMAN | 279 | YGYRVHHDVVDVHFEHPAP-----ALAPNESPKDSPAHEVTGSSGAYMRFDVPRPR         | 331 |
| Q14542 S29A2_HUMAN | 280 | -----KPSVFTVQKIWLTAALCLVLFVFTVLSVFPATAMVTSSTSPGKWSQFF            | 328 |
| Q7RTT9 S29A4_HUMAN | 332 | VQRSWPTFRALLLHRYVVARVIWADMLSIATVYFITLCLFPGLESEIRH-CILGEWL---     | 387 |
| Q14542 S29A2_HUMAN | 329 | NPICCFLLFNIMDWLGRSLTSYFLWPEDEDSRLLPLLVCLRFLFVPLFMLCHVQSRSLPI     | 388 |
| Q7RTT9 S29A4_HUMAN | 388 | -PILIMAVFNLSDFVKGKILAAALPVD--DWRGTHLLACSCLRVVFIPFLFVLCVYPSGMPA-- | 442 |
| Q14542 S29A2_HUMAN | 389 | LFPQDAYFITFMLLFAVSNGLVSLTMCLAPRQVLPHEREVAGALMTFFLALGLSCGASL      | 448 |
| Q7RTT9 S29A4_HUMAN | 443 | --LRHPAWPCIFSLLMGINSNGYFGSVPMILAAGKVPSPKQRELAGNMTVSYMSGLTLGSAV   | 501 |
| Q14542 S29A2_HUMAN | 449 | SFLFKALL-----                                                    | 456 |
| Q7RTT9 S29A4_HUMAN | 502 | AYCTYSLTRDAHGSCLHASTANGSILAGL                                    | 530 |

**Fig S1: Sequence comparison of hEN4 with its paralogs hENT1, 2 and 3.** A) hENT4 and hENT3 sequence comparison: Identity - 20.175, Similarity - 165. B) hENT1 and hENT4 sequence comparison: Identity - 19.37, Similarity - 148. C) hENT2 and hENT4 sequence comparison: Identity - 20.035, Similarity - 146. The sequences were obtained and aligned using Uniprot server.
